# Supplementary material for: Evaporative assembly of ordered microporous films and their hierarchical structures from amphiphilic random copolymers
Source: Royal Society of Chemistry journal article supplement (doi:10.1039/c2sm26741a), 2012-01-01
Supplement: c2sm26741a.pdf [file c2sm26741a.pdf]

## Supporting Information

# Evaporative Assembly of Ordered Microporous Films and their Hierarchical Structures from Amphiphilic Random Copolymers

Apiradee Honglawan<sup>1</sup> and Shu Yang<sup>1,2\*</sup>

<sup>1</sup>Department of Chemical and Biomolecular Engineering

<sup>2</sup>Department of Materials Science and Engineering, University of Pennsylvania, 3231 Walnut  
Street, Philadelphia, PA 19104, USA

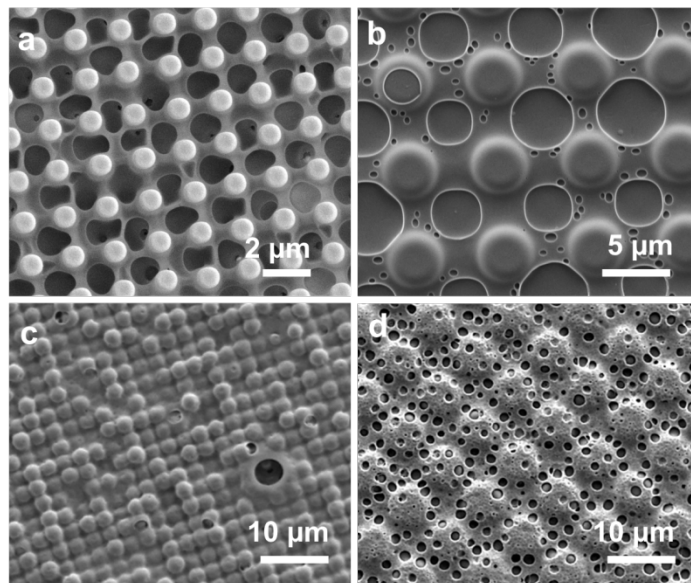

**Figure S1.** SEM images of porous structures of ranPAC formed on SU-8 micropillar arrays with hydroxyl groups activated at different locations. The polymer concentrations are 75 mg/mL (a and c of set I pillars) and 50 mg/mL (b and d of set II pillars), respectively, in a mixture of 1 mL acetone and 80  $\mu$ L toluene. (a-b) Hydroxyl groups were activated only on pillar tops by sitting water droplets for 5 min. (c-d) Hydroxyl groups were activated everywhere on pillars by complete immersing the pillars into water for 15 min.

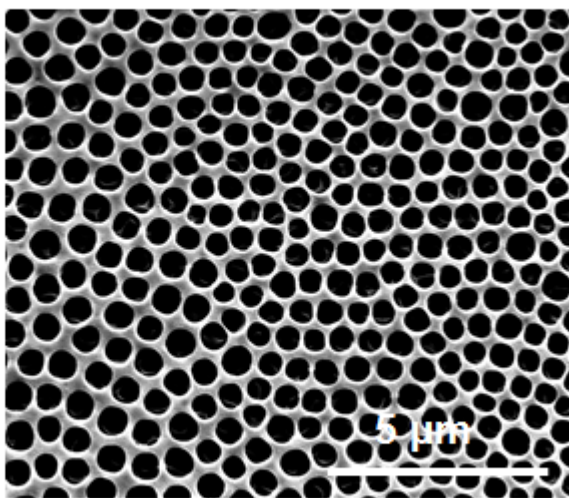

**Figure S2.** SEM image of a porous film of ranPAC formed on a flat SU-8 substrate. The polymer concentration is 150 mg/mL in a mixture of 1 mL acetone and 80  $\mu$ L toluene.
